# Supplementary material for: New insights into the encapsulation and stabilization of heteropolyacids inside the pore walls of mesostructured silica materials
Source: Royal Society of Chemistry journal article supplement (doi:10.1039/b816172k), 2009-01-01
Supplement: b816172k.pdf [file b816172k.pdf]

# New insights into the encapsulation and stabilization of heteropolyacids inside the pore walls of mesostructured silica materials

Véronique Dufaud,<sup>\*1</sup> Frédéric Lefebvre,<sup>\*2</sup> Gerald P. Niccolai<sup>3</sup> and Mimoun Aouine<sup>4</sup>

## Supporting Information for the Journal of Material Chemistry

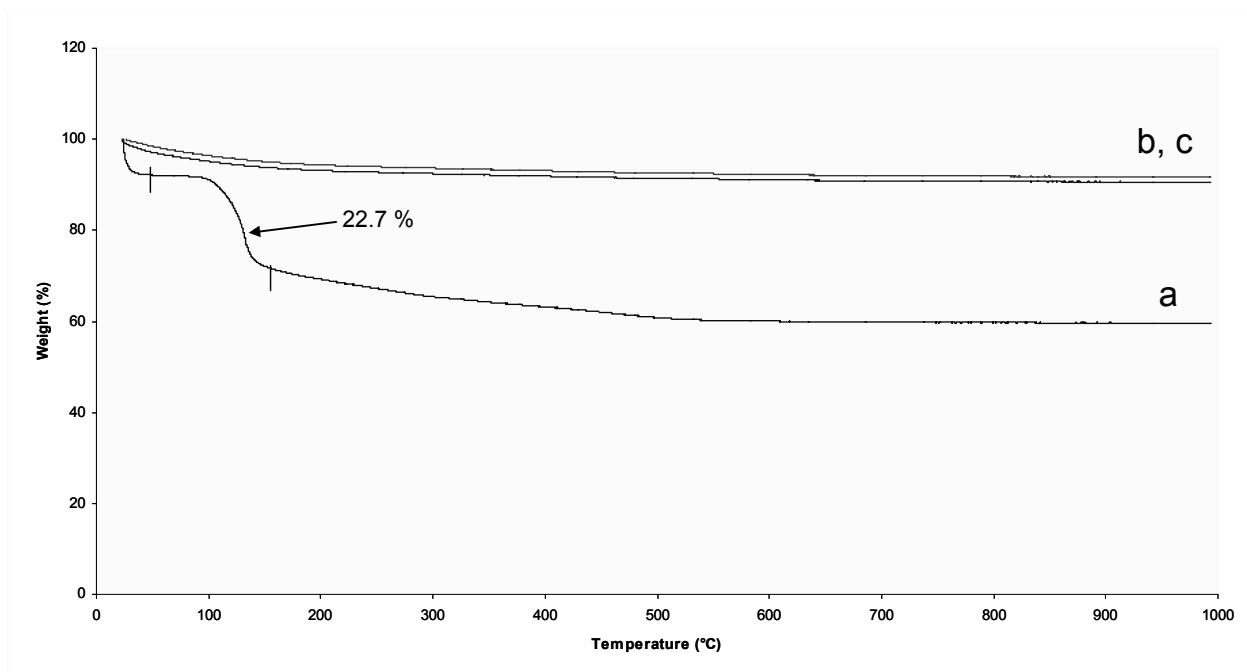

**Fig. S1** Thermogravimetric analysis of (a) **2**; (b) and (c) **2-C** and **2-CE**

<sup>1</sup> Laboratoire de Chimie, UMR 5182 CNRS - Ecole Normale Supérieure de Lyon, 46 allée d'Italie, 69364 Lyon cedex 07, France ; vdufaud@ens-lyon.fr

<sup>2</sup> Chimie, Catalyse, Polymères et Procédés UMR 5265 CNRS-CPE Lyon, 43 bd du 11 Novembre 1918, 69622 Villeurbanne cedex, France; lefebvre@cpe.fr

<sup>3</sup> ICAR, UMR 5191 ENS LSH, 15 parvis Descartes, 69342 Lyon cedex 07, France.

<sup>4</sup> Institut de Recherches sur la Catalyse et l'Environnement de Lyon, 2 avenue Albert Einstein, 69626 Villeurbanne cedex, France.

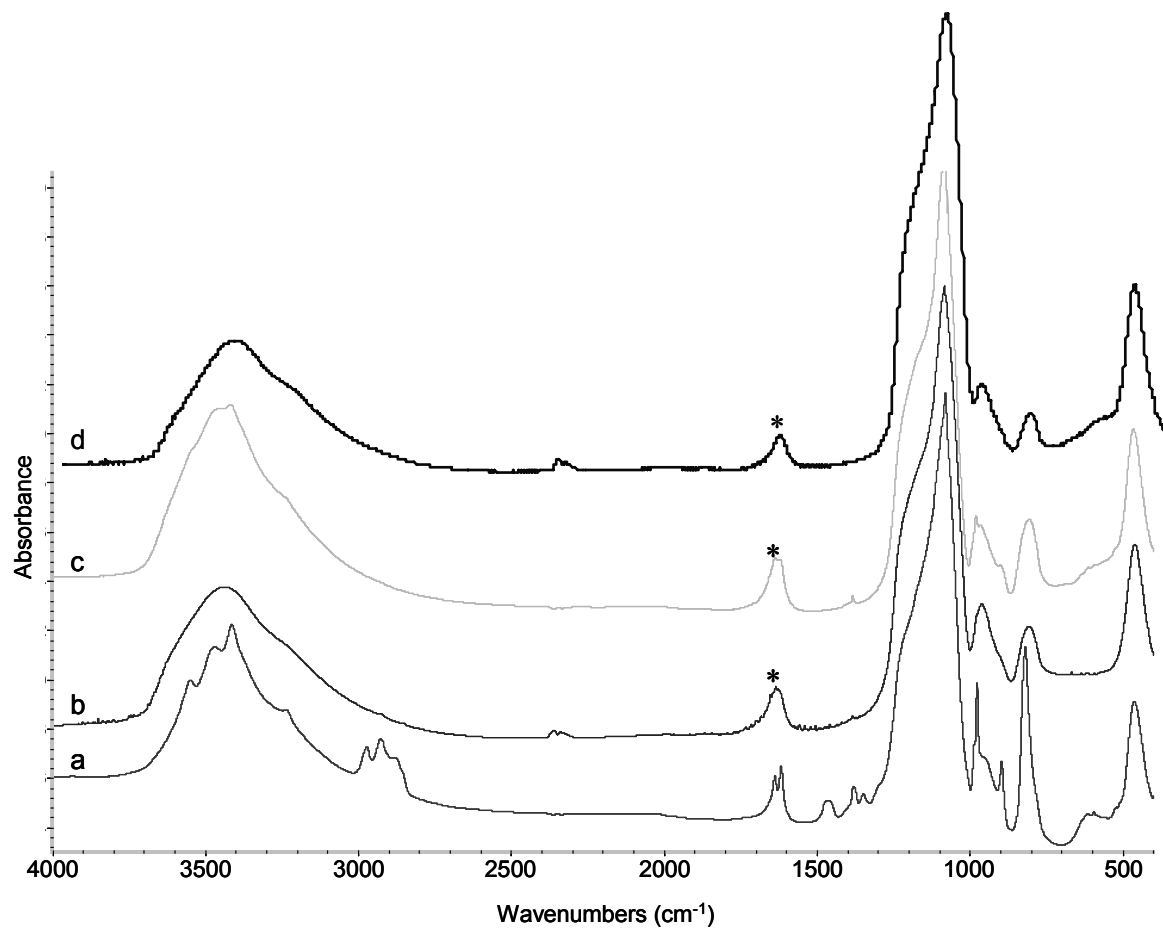

**Fig. S2** FT-IR spectra of (a) **2**; (b) **2-C**; (c) **2-CE**; (d) **2-E**

\* at ca. 1630 cm<sup>-1</sup> denotes for adsorbed residual water

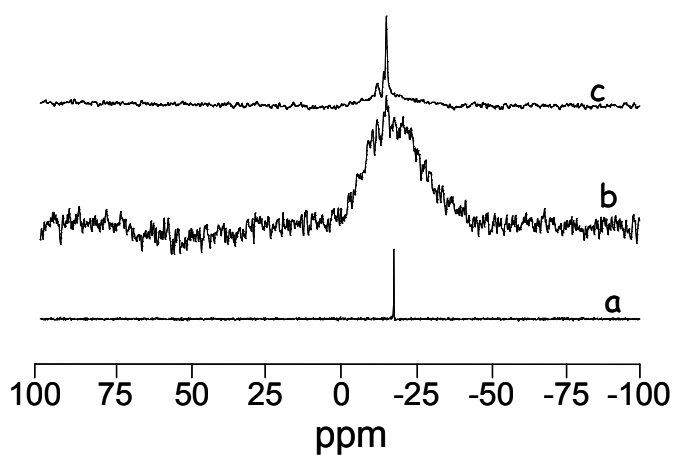

**Fig. S3** MAS <sup>31</sup>P NMR spectra of (a) **2**; (b) **2-C**; (c) **2-CE** (second lot, W 28.5%<sub>wt</sub>)

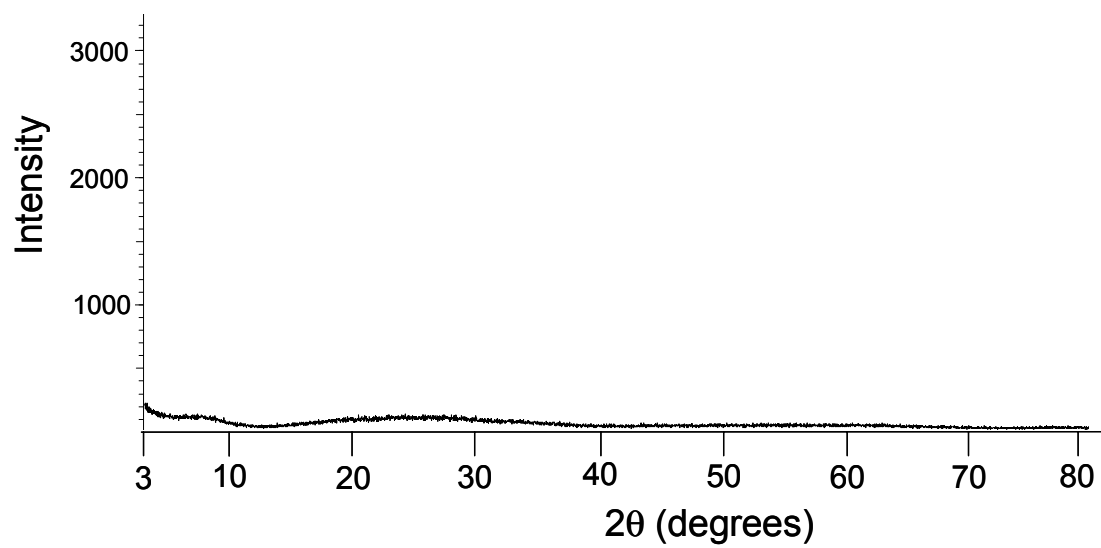

**Fig. S4** XRD pattern of **2-CE** in the 3° to 80° (2θ scale) region

**Typical TEM/EDX analysis on  $\text{H}_3\text{PW}_{12}\text{O}_{40}$  encapsulated into SBA-15 silica material (28.55 %wt W  $\cong$  9.3 mol W per 100 atom Si) (2-CE second lot)**

| Sampling # | Si (atom) | W (atom) |
|------------|-----------|----------|
| 1          | 100       | 12.80    |
| 2          | 100       | 14.93    |
| 3          | 100       | 14.74    |
| 4          | 100       | 11.6     |

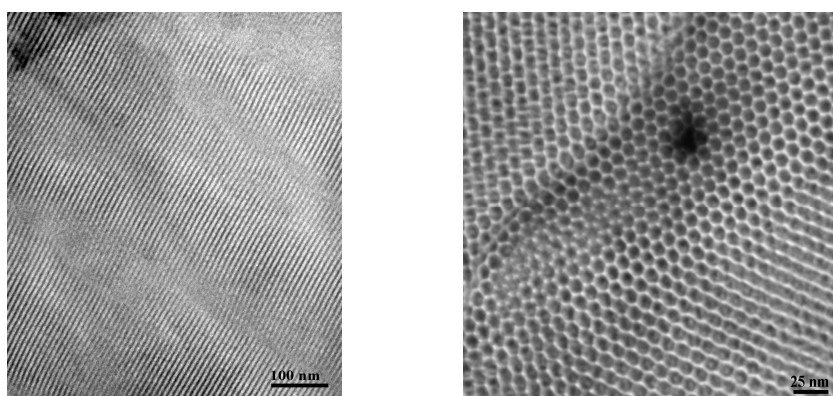

**Fig. S5** TEM micrograph of **2-CE** (second lot), in the direction perpendicular to the pore axis (left) and along the direction of the pore axis (right)

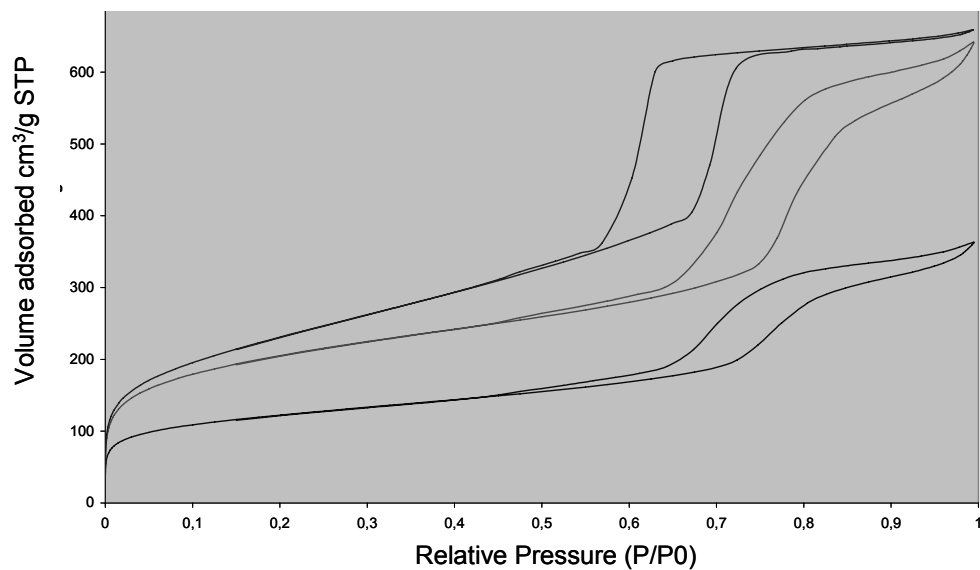

**Fig. S6** Nitrogen adsorption/desorption isotherm of **2-CE** (bottom) ; **2-E** (middle) ; **1-CE** (top)

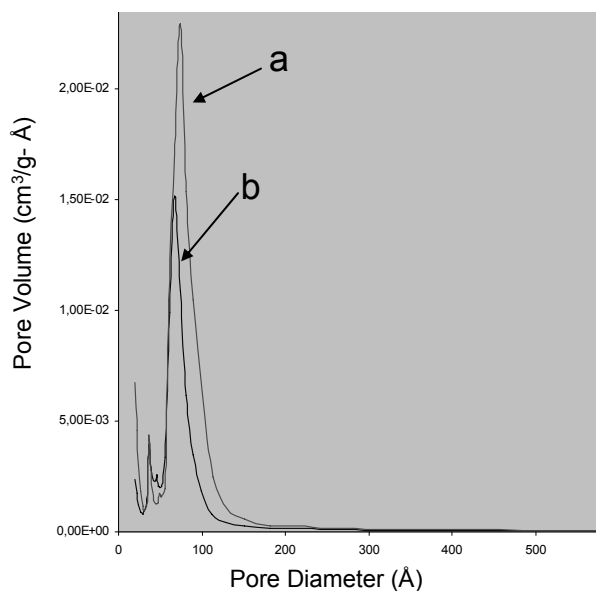

**Fig. S7** Pore size distribution (from the BJH calculations) of (a) **2-E** ; (b) **2-CE**

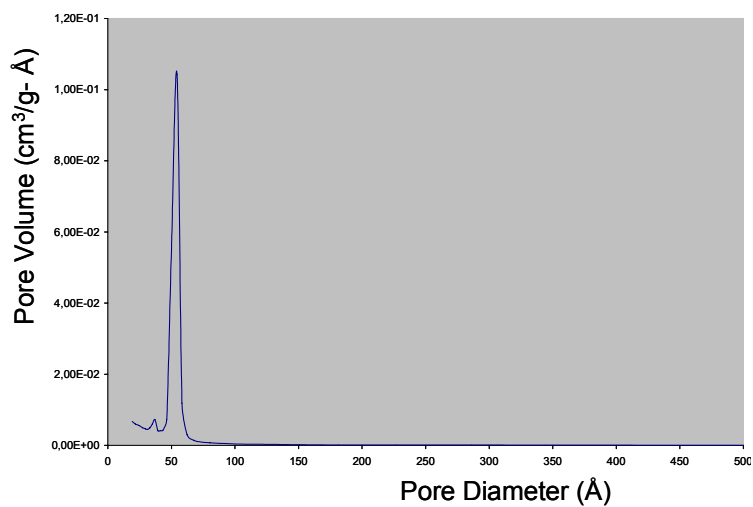

**Fig. S8** Pore size distribution (from the BJH calculations) of **1-E**

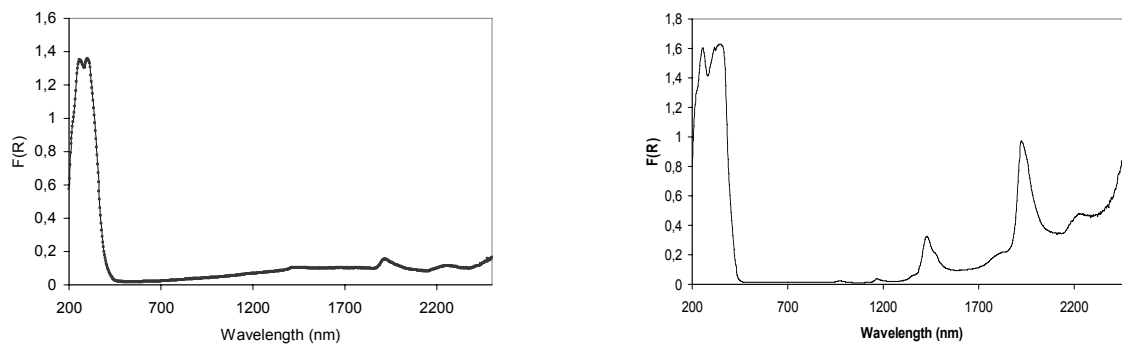

**Fig. S9** DR UV-Vis of **2-CE** (left) and of H<sub>3</sub>PW<sub>12</sub>O<sub>40</sub> (right)

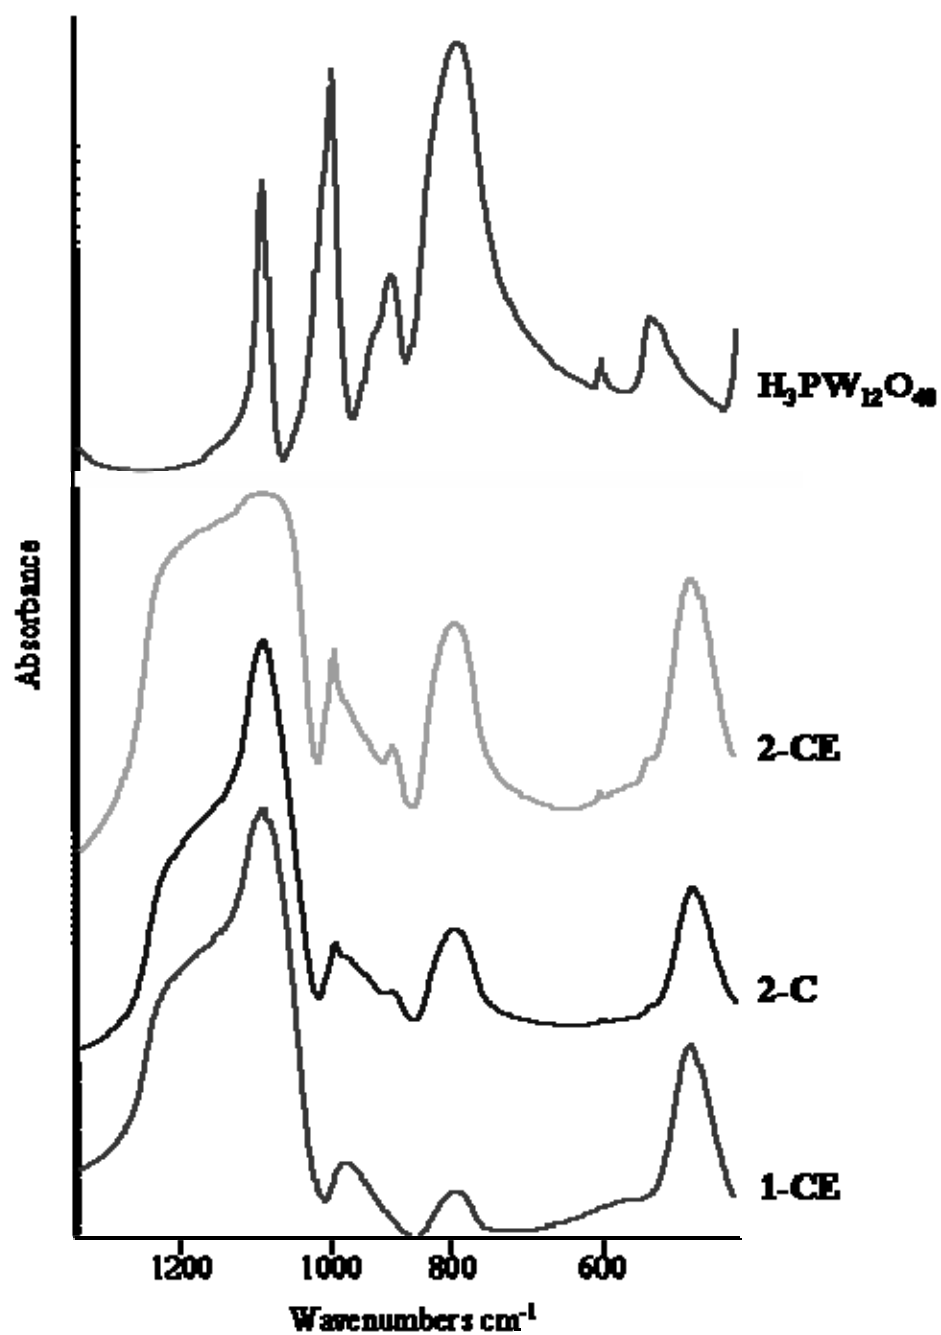

**Fig. S 10** Infrared spectra of  $\text{H}_3\text{PW}_{12}\text{O}_{40}$ , **2-CE**, **2-C**, and **1-CE**. One should note that for **2-C** and especially **2-CE**, one can discern the characteristic absorbances of the molecular species (top) around 630 and 980  $\text{cm}^{-1}$  (other characteristic peaks are masked by strong silica absorbances). Such peaks are lacking in the spectrum of **1-CE**.

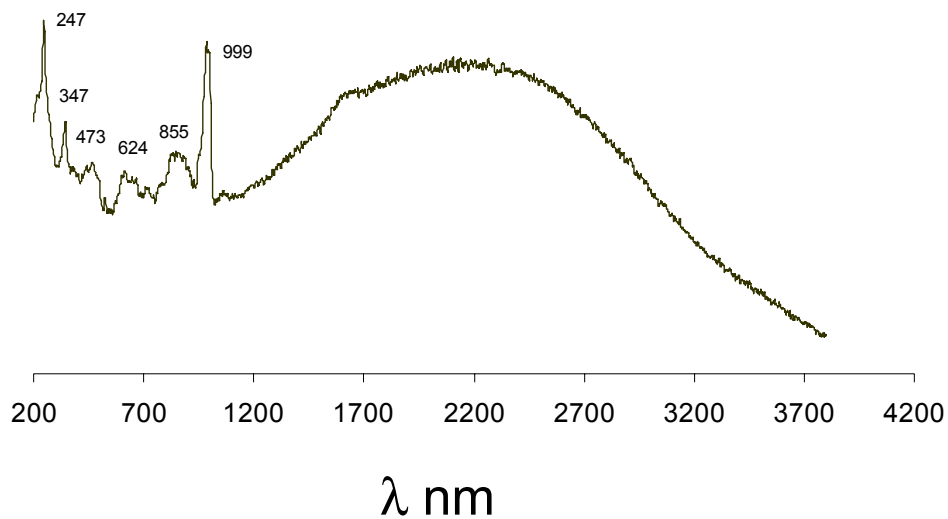

**Fig. S 11** Raman spectroscopy of  $\text{H}_3\text{PMo}_{12}\text{O}_{40}$  encapsulated in SBA-15 type silica after calcination and extraction
